1 **Intraguild predation does not necessarily have negative effects**  
2 **on pest biological control: insights from a multiple consumer–**  
3 **multiple resource food web population model**

4 Michel Iskin da S. Costa, Lucas dos Anjos<sup>1</sup>

5 Laboratório Nacional de Computação Científica, Av. Getúlio Vargas, 333 –  
6 Quitandinha, Petrópolis, RJ 25651–070 Brazil

7  
8  
9 **Abstract**

10 We develop a food web population dynamical based on an  
11 experimental pest biocontrol setup consisting of thrips and aphids  
12 (pests) being consumed by two agents *Macrolophus pygmaeus*  
13 and *Orius laevigatus*, and with *O. laevigatus* being an intraguild  
14 predator of *M. pygmaeus*. By means of numerical simulations, we  
15 show that pest biocontrol disruption can be avoided depending on  
16 initial population densities of pests and agents, despite the  
17 intraguild predation (IGP) of *O. laevigatus* upon *M. pygmaeus*.  
18 This possible avoidance of pest biocontrol disruption is in  
19 accordance with the referred experimental setup and moreover,  
20 the proposed model corroborates the importance of initial  
21 densities of pests and agents in the determination of the failure or  
22 success of pest biocontrol found in this and other biocontrol  
23 experimental setups.

24  
25 *Keywords: pest biocontrol; greenhouse–crop system; intraguild*  
26 *predation; multiple consumer–multiple resource interaction;*  
27 *population dynamical model.*

28  
29  
30 <sup>1</sup> Corresponding author. Tel.: +55 24981217115.  
31 E–mail addresses: [michel@lncc.br](mailto:michel@lncc.br) (M.I.S. Costa ), [lanjos@lncc.br](mailto:lanjos@lncc.br) (L. dos Anjos).  
32  
33  
34  
35  
36

## 37 **Introduction**

38

39       Generalist predators that feed on more than one species of  
40 prey have proven to be efficient biological control agents (e.g.,  
41 Gardiner and Landis, 2007). Because most crops are attacked by  
42 more than one species of pest, biological control programs,  
43 especially in greenhouse crops, are increasingly based on releases  
44 of generalist predators against common greenhouse pests such as  
45 thrips, whiteflies, spider mites, aphids, and leaf miner moths  
46 (Messelink, 2012).

47

48       Despite their broad diet spectrum, generalist predators do  
49 not always control all pests (Symondson et al., 2002) and other  
50 natural enemies are needed in such situations. One approach is to  
51 release several species of generalist predators for multiple pest  
52 control. However, generalist predators are often involved in the  
53 competition for shared prey and predation upon each other  
54 (intraguild predation, IGP (Polis et al. (1989))), which can affect  
55 both their coexistence and the results of biological control.

56

57       In order to assess whether the negative effects of IGP on  
58 pest biocontrol can be mitigated in a specific biological setup,  
59 Messelink and Janssen. (2014) evaluated in an experimental study  
60 the coexistence of two generalist predatory bugs *Macrolophus*  
61 *pygmaeus* Rambur (Hemiptera:Miridae) and *Orius laevigatus*  
62 (Fieber) (Hemiptera: Anthocoridae) in a sweet pepper crop with  
63 two pest species as shared resources. The two pests used were the  
64 peach aphid *Myzus persicae* (Sulzer) (Hemiptera: Aphididae) and  
65 the western flower thrips *Frankliniella occidentalis* Pergande  
66 (Thysanoptera: Thripidae), both important pests in sweet pepper.  
67 Moreover, they also found a unidirectional intraguild predation  
68 for *Orius majusculus* (Reuter) (Hemiptera: Anthocoridae) preying  
69 on *M. pygmaeus*.

70            Their study shows that despite being involved in intraguild  
71 predation, the two agents (predators) complemented each other in  
72 the control of the two pests.

73

74            Motivated by the experimental finding that these two agents  
75 (predators) can coexist in a sweet pepper crop, and their presence  
76 does not affect the control of the two pest species we developed a  
77 population dynamical model that can qualitatively generate this  
78 lack of pest control disruption found in the laboratory  
79 experiments carried out by Messelink and Janssen (2014).

80

81            The outline of the present work is as follows. In section 2  
82 we present the model together with the interpretation of its  
83 variables and parameters. In section 3 we perform the numerical  
84 bifurcation analysis of the model and present the biological  
85 results in terms of pest biocontrol. In section 4 we discuss the  
86 results of the present work.

87

88

89

## 90 **2 Methods**

91

### 92 **A multiple consumer–multiple resource food web model**

93

94            Messelink and Janssen (2014) performed experiments to  
95 evaluate the co–occurrence of the generalist predators  
96 *Macrolophus pygmaeus* and *Orius laevigatus* and their control of  
97 two pests in a sweet pepper crop. Both predators prey on thrips  
98 and aphids, and *O. laevigatus* is an intraguild predator of *M.*  
99 *pygmaeus*. Their experimental food web is schematically shown  
100 in figure 1.

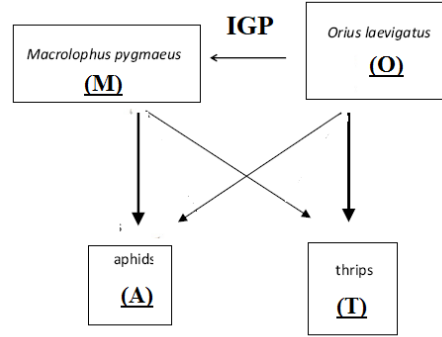

101  
102 Figure 1. A food web containing multiple consumer–multiple resource  
103 interactions according to the experiment performed in Messelink and  
104 Janssen (2014). Arrows indicate predation. IGP means intraguild predation.

105  
106 A continuous–time mathematical population dynamical  
107 model of the species in the food web depicted in figure 1 can take  
108 on the form:

109  
110

$$\frac{dA}{dt} = \underbrace{r_A A \left(1 - \frac{A}{K_A}\right)}_{\substack{\text{logistic} \\ \text{growth} \\ \text{of } A}} - \underbrace{\left(\frac{a_{MA} A}{1 + a_{MT} h_{MT} T + a_{MA} h_{MA} A}\right) M}_{\substack{\text{multispecies} \\ \text{functional} \\ \text{response of} \\ \text{agent } M \text{ upon } A}} - \underbrace{\left(\frac{a_{OA} A}{1 + a_{OT} h_{OT} T + a_{OA} h_{OA} A + a_{OM} h_{OM} M}\right) O}_{\substack{\text{multispecies} \\ \text{functional} \\ \text{response of} \\ \text{agent } O \text{ upon } A}}$$

111  
112  
113

114

$$\frac{dT}{dt} = \underbrace{r_T T \left(1 - \frac{T}{K_T}\right)}_{\substack{\text{logistic} \\ \text{growth} \\ \text{of } T}} - \underbrace{\left(\frac{a_{MT} T}{1 + a_{MT} h_{MT} T + a_{MA} h_{MA} A}\right) M}_{\substack{\text{multispecies functional} \\ \text{response of agent } M \text{ upon } T}} - \underbrace{\left(\frac{a_{OT} T}{1 + a_{OT} h_{OT} T + a_{OA} h_{OA} A + a_{OM} h_{OM} M}\right) O}_{\substack{\text{multispecies functional} \\ \text{response of agent } O \\ \text{upon } T}}$$

115  
116  
117

(1)

$$\frac{dM}{dt} = \underbrace{\left( \frac{ef_{AM}a_{MA}A + ef_{TM}a_{MT}T}{1 + p_{MT}a_{MT}h_{MT}T + p_{MA}a_{MA}h_{MA}A} \right)}_{\substack{\text{multispecies numerical} \\ \text{response of agent } M \text{ from the} \\ \text{consumption of pest } A \text{ and } T}} M - \underbrace{\left( \frac{ef_{MO}a_{OM}M}{1 + a_{OT}h_{OT}T + a_{OA}h_{OA}A + a_{OM}h_{OM}M} \right)}_{\substack{\text{multispecies numerical} \\ \text{response of agent } O \text{ from the} \\ \text{consumption (intraguild predation)} \\ \text{of agent } M}} O$$

118

$$- \underbrace{m_M M}_{\substack{\text{linear density} \\ \text{dependent} \\ \text{mortality} \\ \text{rate of agent } M}} - \underbrace{q_M M^2}_{\substack{\text{nonlinear density} \\ \text{dependent} \\ \text{mortality} \\ \text{rate of agent } M}}$$

119

120

121

$$\frac{dO}{dt} = \underbrace{\left( \frac{ef_{MO}a_{OM}M + ef_{AO}a_{OA}A + ef_{TO}a_{OT}T}{1 + a_{OM}h_{OM}M + a_{OT}h_{OT}T + a_{OA}h_{OA}A} \right)}_{\substack{\text{multispecies numerical} \\ \text{response of agent } O \text{ from the} \\ \text{consumption of pests } A \text{ and } T \\ \text{and the consumption (intraguild predation)} \\ \text{of agent } M}} O - \underbrace{m_O O}_{\substack{\text{linear density} \\ \text{independent} \\ \text{mortality} \\ \text{rate of agent } O}} - \underbrace{q_O O^2}_{\substack{\text{nonlinear density} \\ \text{dependent} \\ \text{mortality} \\ \text{rate of agent } O}}$$

123

124

125 A and T are the densities of the pests (prey), while O and M  
 126 represent the densities of the control agents (predators). The  
 127 definitions of the variables and the parameters of the model (1)  
 128 are shown in table 1.

129

130

131 Table 1 Definition of variables and parameters of the model (1)

132

| Variables  | Meaning                                                                        |
|------------|--------------------------------------------------------------------------------|
| $A$        | density of pest $A$                                                            |
| $T$        | density of pest $T$                                                            |
| $M$        | density of agent $M$                                                           |
| $O$        | density of agent $O$                                                           |
| Parameters |                                                                                |
| $r_A$      | intrinsic growth rate of pest $A$                                              |
| $r_T$      | intrinsic growth rate of pest $T$                                              |
| $K_A$      | carrying capacity of pest $A$                                                  |
| $K_T$      | carrying capacity of pest $T$                                                  |
| $a_{MA}$   | attack coefficient of agent $M$ on pest $A$                                    |
| $a_{MT}$   | attack coefficient of agent $M$ on pest $T$                                    |
| $a_{OA}$   | attack coefficient of agent $O$ on pest $A$                                    |
| $a_{OT}$   | attack coefficient of agent $O$ on pest $T$                                    |
| $a_{OM}$   | attack coefficient of agent $O$ on agent $M$                                   |
| $ef_{AM}$  | conversion coefficient from pest $A$ to agent $M$                              |
| $ef_{AO}$  | conversion coefficient from pest $A$ to agent $O$                              |
| $ef_{TM}$  | conversion coefficient from pest $T$ to agent $M$                              |
| $ef_{TO}$  | conversion coefficient from pest $T$ to agent $O$                              |
| $ef_{MO}$  | conversion coefficient from agent $M$ to agent $O$                             |
| $h_{MA}$   | manipulation time of agent $M$ on pest $A$                                     |
| $h_{MT}$   | manipulation time of agent $M$ on pest $T$                                     |
| $h_{OA}$   | manipulation time of agent $O$ on pest $A$                                     |
| $h_{OT}$   | manipulation time of agent $O$ on pest $T$                                     |
| $h_{OM}$   | manipulation time of agent $O$ on agent $M$                                    |
| $m_M$      | density independent <i>per capita</i> mortality rate of agent $M$              |
| $m_O$      | density independent <i>per capita</i> mortality rate of agent $O$              |
| $q_M$      | coefficient of density dependent <i>per capita</i> mortality rate of agent $M$ |
| $q_O$      | coefficient of density dependent <i>per capita</i> mortality rate of agent $O$ |

133

134

135 We assume a logistic growth in the pests  $A$  and  $T$  because of  
 136 the presumed lack of exploitative competition among them. This  
 137 assumption is based on another experiment where exploitative  
 138 competition between the pests was improbable, certainly due to  
 139 the large leaf size of the crop (Messelink et al., 2008).

140

141 The density dependent–mortality rate of the agents  $M$  and  
 142  $O$ , i.e., the expressions  $q_M M^2$  and  $q_O O^2$  can be associated with con–  
 143 specific cannibalism. For instance, control agent such as spider  
 144 mite of the species *Amblyseius swirski* AthiasHenriot

145 (Acari:Phytoseiidae) is subject to con-specific cannibalism in the  
146 early stages of their life cycle (Rasmy et al., 2004).

147

148 In Messelink and Janssen (2014) it is experimentally shown  
149 that besides the coexistence of the two agents, the intraguild  
150 predation between these agents does not disrupt pest biological  
151 control. Therefore, regarding this experimental result, it is  
152 interesting to investigate if our proposed model (1) can yield this  
153 same result in qualitative terms. This can be verified by increasing  
154 the value of the intraguild predation attack coefficient of *O.*  
155 *laevigatus* upon *M. pygmaeus* ( $a_{OM}$ ) in the model (1) and  
156 checking how this increase in IGP affects the densities of all  
157 populations in the equilibrium in the model (1). By having the  
158 values of the population densities we can assess whether the  
159 agents coexist and do not disrupt biocontrol (as found in the  
160 experiment). To perform this analysis, a numerical bifurcation of  
161 the model (1) as a function of  $a_{OM}$  by means of the software  
162 package XPPAUT (Ermentrout, 2002) is undertaken. In essence,  
163 this software calculates the equilibrium points of the nonlinear  
164 differential equations given by the model (1) (i.e., the numerical  
165 solutions to the system of equations given by  $dA/dt=0$ ,  $dT/dt=0$ ,  
166  $dM/dt=0$ , and  $dO/dt=0$ ) as one varies, for instance, the parameter  
167  $a_{OM}$ , together with the real part of their corresponding  
168 eigenvalues. This information is gathered to draw the graphs with  
169 equilibrium population density levels and their respective stability  
170 characteristics (stable/unstable equilibrium points) displayed  
171 throughout this work. Moreover, we call attention to the fact that  
172 the choice of the parameter values of the model (1) was partially  
173 guided by an intention to create, when possible, stable dynamics  
174 in the analyzed models, avoiding thus, for instance, sustained  
175 oscillations (e.g., limit cycles). In this way, all species densities  
176 variation of the model (1) as a consequence of changes in the  
177 intensity of the intraguild coefficient attack  $a_{OM}$  can be promptly

178 read off the bifurcation diagrams without resorting to mean value  
179 calculation of the species densities due to the species temporal  
180 oscillations.

181

## 182 **Results**

183

184 The resulting bifurcation diagram of all the involved species  
185 ( $A, T, M, O$ ) of the model (1) is displayed in figure 2. These  
186 diagrams show the densities of the species when the intraguild  
187 predation attack coefficient of *O. laevigatus* upon *M. pygmeus*  
188 ( $a_{OM}$ ) is increased.

189

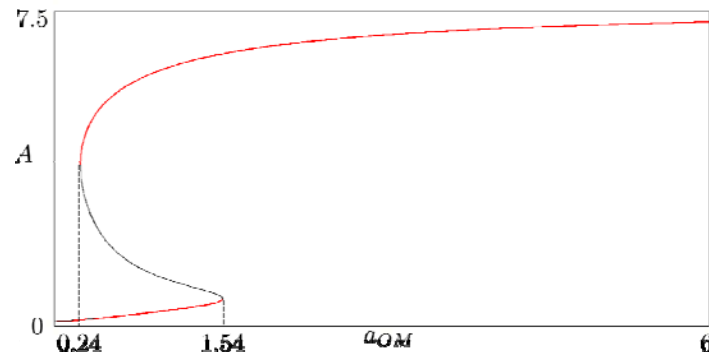

190

(a) *Aphids (A)*

191

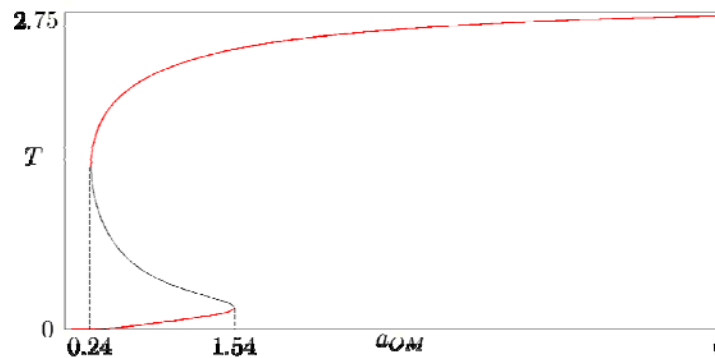

192

193

(b) *Thrips (T)*

194



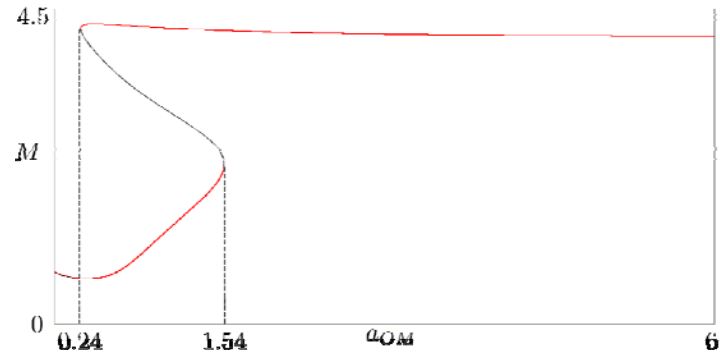

195

196

197

(c) *M. pygmaeus* ( $M$ )

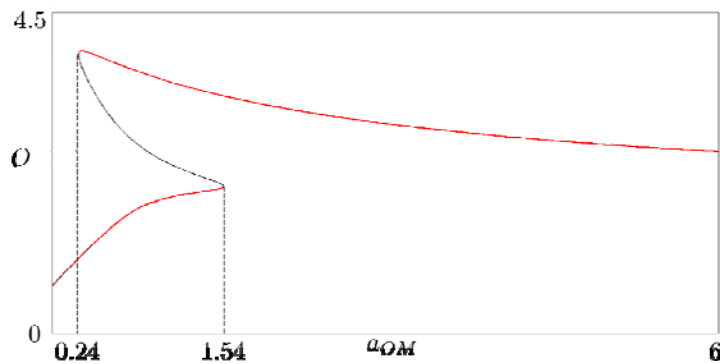

198

199

(d) *O. laevigatus* ( $O$ )

200 Figure 2. A numerical bifurcation diagram of model (1) as a function of the  
 201 intraguild predation attack coefficient of *O. laevigatus* upon *M. pygmaeus*  
 202 ( $a_{OM}$ ). Bistability occurs along the interval  $0.24 < a_{OM} < 1.54$ . Red lines:  
 203 stable equilibrium points; black lines: unstable equilibrium points.

204 Parameter values:  $r_A=1.12$ ;  $r_T=1.1$ ;  $K_A=9.12$ ;  $K_T=3.444$ ;  $a_{OT}=0.9$ ;  $a_{OA}=0.9$ ;  
 205  $a_{MT}=1$ ;  $a_{MA}=1$ ;  $ef_{MO}=5$ ;  $ef_{AO}=5$ ;  $ef_{TO}=5$ ;  $ef_{TM}=2$ ;  $ef_{AM}=2$ ;  $h_{OM}=2$ ;  $h_{OT}=2$ ;  
 206  $h_{OA}=2$ ;  $h_{MT}=2$ ;  $h_{MA}=2$ ;  $m_T=0.1$ ;  $m_O=0.1$ ;  $q_M=0.5$ ;  $q_O=0.5$ .

207

208

209 Note first that the food web in figure 1 consists of two  
210 community modules (Holt, 1997) of type “two prey species that  
211 share one predator” (i.e.,  $A - T - M$  and  $A - T - O$ ) which are  
212 connected also by the intraguild predation of  $O$  upon  $M$  (i.e.,  
213 coefficient  $a_{OM}$ ). These two community modules ( $A - T - M$  and  
214  $A - T - O$ ) are known to possess positive bistability (Abrams and  
215 Matsuda, 1996) (here, positive bistability is the occurrence of two  
216 different population levels in which all species can coexist).  
217 Actually, the choice of the parameter values was also guided by  
218 the creation of a positive bistability in the model (1) (as shown in  
219 figure 2) on account of the following reason: this bistability in the  
220 model (1), which occurs throughout the interval  $0.24 < a_{OM} <$   
221  $1.54$ , can provide a two-fold explanation: (i) the red lower  
222 branch of the pests  $A$  and  $T$  may well represent pest suppression  
223 (relatively low pest levels), while (ii) the red upper branch of the  
224 pests  $A$  and  $T$  may well represent the disruption of pest control  
225 (relatively high pest levels). In a way, item (i) corroborates that  
226 predation of one agent upon the other (the intraguild predation of  
227 *O. laevigatus* upon *M. pygmaeus*) does not necessarily have  
228 negative effects on biological control of aphids and thrips  
229 (Messelink and Janssen, 2014).

230

231 Importantly, model (1) also suggests that these two  
232 outcomes in pest control (pest suppression and disruption of pest  
233 control) depend on the initial level of the populations (a  
234 consequence of the positive bistability of the model (1); see figure  
235 2). This result corroborates the importance of initial population  
236 densities in pest control (Messelink and Janssen (2014), p.4; see  
237 also observations about the importance of initial population  
238 densities in a biocontrol prey-predator experimental setup in  
239 Leman and Messelink (2014)). However, to be more precise with  
240 respect to the mentioned texts in the above references, one should

241 carry out time–series simulations of the model (1) with varying  
242 initial densities of the predators *O. laevigatus* (i.e.,  $O(0)$ ) and *M.*  
243 *pygmaeus* (i.e.,  $M(0)$ ) and check the final densities of the pests  
244 *Aphids* ( $A$ ) and *Thrips* ( $T$ ) so as to assess the efficiency of pest  
245 control with respect to initial densities of agents (e.g., inoculative  
246 (low levels of) /inundative (high levels of) agent releases).  
247 Nonetheless, it is important to remark that the model (1) also  
248 suggests that increasing the intraguild predation attack coefficient  
249 of *O. laevigatus* upon *M. pygmaeus* ( $a_{OM}$ ) brings about the  
250 increase of both pest levels in the lower and in the upper branch  
251 of the bifurcation diagrams of figure 2.

252

253

## 254 **Discussion**

255

256 Messelink and Janssen (2014) experimentally evaluated how  
257 the co–occurrence of the generalist control agents *Macrolophus*  
258 *pygmaeus* and *Orius laevigatus* affected their control of two pests  
259 in a sweet pepper crop. Both agents prey on thrips and aphids, and  
260 *O. laevigatus* is an intraguild predator of *M. pygmaeus*. Their  
261 study provides further evidence that the use of natural enemies  
262 that can be involved in intraguild predation does not necessarily  
263 have negative effects on biological control (confirming other  
264 experimental studies). Moreover, they also mention that the  
265 mechanisms that prevent such negative effects of intraguild  
266 predation and the exclusion of one agent (predator) by the other  
267 remain elusive.

268

269 In this work, by means of simulations of a proposed  
270 theoretical food web population dynamical model describing the  
271 biotic species interactions in the mentioned experiment, we  
272 showed that the use of natural enemies that can be involved in  
273 intraguild predation does not necessarily have negative effects on

274 biological control. This result is conveyed in the model (1) by the  
275 relatively low pests' equilibrium densities in figure 2.  
276 Furthermore, from a myriad of possible biological processes, we  
277 narrowed them down to those included in the model (1) as  
278 potential candidates to explain to some extent how negative  
279 effects of intraguild predation and the exclusion of one agent  
280 (predator) by the other can be avoided in this specific intraguild  
281 food web. That is to say, perhaps conceptual  
282 (strategic/phenomenological) models (May, 2001) such as model  
283 (1) (and/or others) could shed some light to help unveil these  
284 mechanisms – at least, qualitatively– and thereby lessen their  
285 seeming elusiveness in experimental setups.

286

287 In a more general context of food web population dynamics  
288 theory, we investigated how the effects of a disturbance (in our  
289 case, an increase in the intensity of the intraguild attack  
290 coefficient  $a_{OM}$ ) propagate through the species densities of a  
291 specific food web. We think that this conjunction of applied and  
292 theoretical ecology can contribute to expanding the understanding  
293 of how natural enemy–density–mediated indirect interactions may  
294 be used to enhance pest biocontrol strategies (Chailleux et al.  
295 2014).

296

297

## 298 **References**

299

300 Abrams, P.A., Matsuda, H., 1996. Positive indirect effects  
301 between prey species that share predators. *Ecology*, 77, 610–616.

302

303 Case, T.J., 2000. *An Illustrated Guide to Theoretical*  
304 *Ecology*. Oxford University Press. New York. USA.

305

306 Chailleux, A., Mohl, E. K., Alves, M. T., Messelink, G. J.,  
307 Desneux, N., 2014. Natural enemy–mediated indirect interactions  
308 among prey species: potential for enhancing biocontrol services in  
309 agroecosystems, *Pest Management Science*, 70, 1769–1779.

310  
311 Gardiner, M.M. and Landis, D.A. 2007. Impact of intraguild  
312 predation by adult *Harmonia axyridis* (Coleoptera: Coccinellidae)  
313 on *Aphis glycines* (Hemiptera: Aphididae) biological control in  
314 cage studies. *Biological control*, 40, 386-395.

315  
316 Ermentrout, B., 2002. Simulating, analyzing, and animating  
317 dynamical systems: a guide to XPPAUT for researchers and  
318 students. Vol. 14. SIAM

319  
320 Holt, R. D., 1997. Community modules. In: Gange, A. C.,  
321 Brown, V. K. (Eds.), *Multitrophic interactions in terrestrial*  
322 *systems*. Blackwell Science Oxford, UK, pp. 333–339.

323  
324 Leman, A., Messelink, G. J. 2014. Supplemental food that  
325 supports both predator and pest: A risk for biological control?  
326 *Experimental and Applied Acarology*, 65, 511-524.

327  
328 May, R.M., 2001. *Stability and Complexity in Model*  
329 *Ecosystems*. Princeton University Press, USA.

330  
331 Messelink, G. J., Maanen, R. van, Steenpaal, S.E.F. van,  
332 Janssen, A. 2008. Biological control of thrips and whiteflies by a  
333 shared predator: Two pests are better than one. *Biological*  
334 *Control*, 44, 372–379.

335  
336 Messelink, G. J. 2012. Generalist predators, food web  
337 complexities and biological pest control in greenhouse crops. PhD  
338 thesis, University of Amsterdam, The Netherlands.

339

340 Messelink , G. J., Janssen, A.. 2014. Increased control of  
341 thrips and aphids in greenhouses with two species of generalist  
342 predatory bugs involved in intraguild predation. *Biological*  
343 *Control*, 79, 1–7.

344

345 Okuyama, T. 2009. Intraguild predation in biological  
346 control: consideration of multiple resource species. *BioControl*,  
347 54, 3–7.

348

349 Rasmy, A. H., Abou–El–Ella, G. M., Hussein, H. E. 2004.  
350 Cannibalism and interspecific predation of the phytoseiid mite,  
351 *Amblyseius swirskii*. *Journal of Pest Science*, 77: 23–25.

352

353
